# Supplementary material
Source: Springer Nature journal article supplement (https://www.springermedizin.de/resource/supplementary/12885_2009_2167_MOESM1_ESM.pdf/9460680)

pAKT

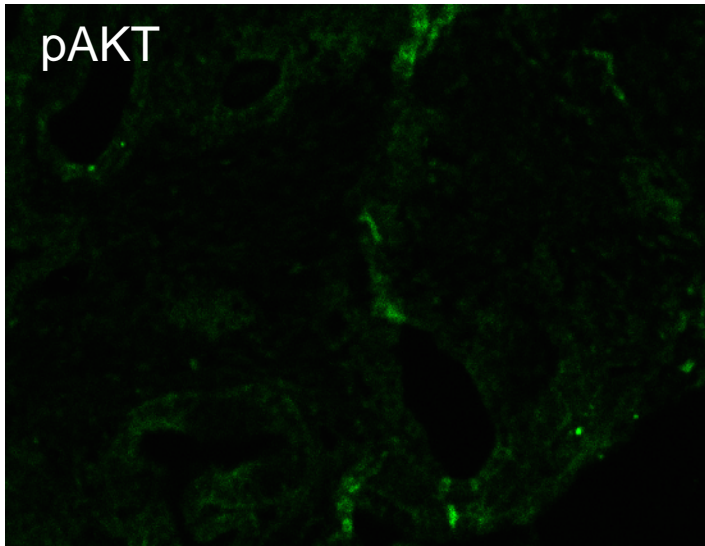

pERK

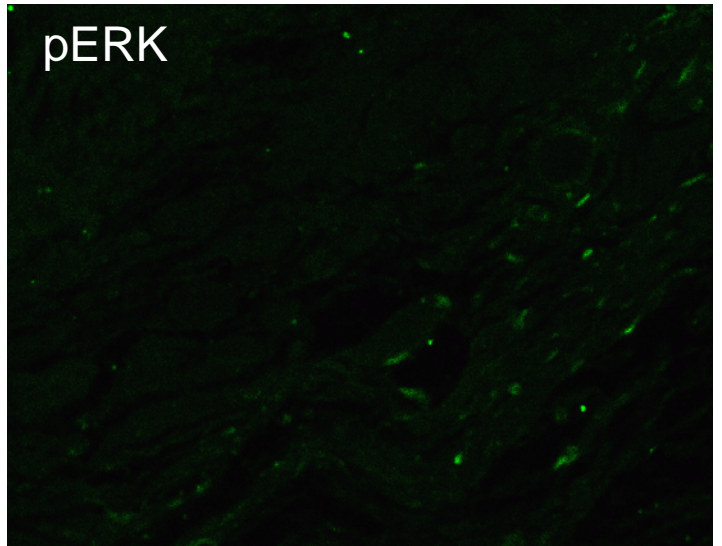

pS6

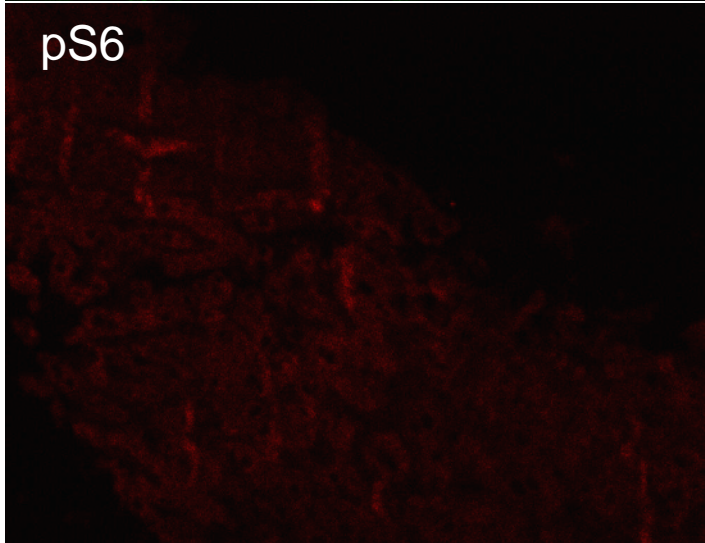

p4E-BP-1

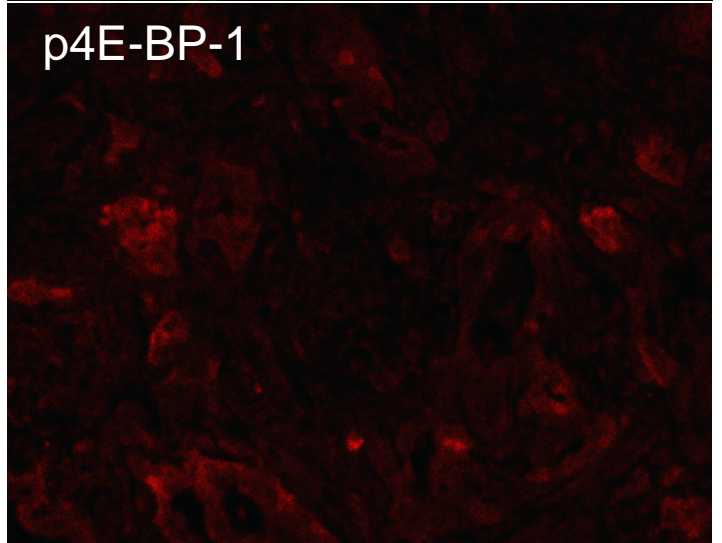

Supplement: MOESM1 [file 9460680]
